# Supplementary material for: In Vitro Acylation of Okadaic Acid in the Presence of Various Bivalves’ Extracts
Source: MDPI journal article supplement (doi:10.3390/md11020300), 2013-01-29
Supplement: s1 [file s1]

marinedrugs-11-00300-s001.mol
  corina  05201404003D 1   1.00000     0.00000 
CORINA 3.49 0023  12.04.2013
 65 71  0  0  0  0  0  0  0  0999 V2000
   -2.9418    0.6402    1.5645 O   0  0  0  0  0  0  0  0  0  0  0  0
   -3.8157   -1.6683    1.6176 C   0  0  0  0  0  0  0  0  0  0  0  0
   -2.6945   -0.6746    1.4550 C   0  0  0  0  0  0  0  0  0  0  0  0
   -3.8281   -5.2908    2.9161 C   0  0  0  0  0  0  0  0  0  0  0  0
   -4.3886   -3.9959    2.3223 C   0  0  0  0  0  0  0  0  0  0  0  0
   -3.2432   -3.0142    2.0665 C   0  0  0  0  0  0  0  0  0  0  0  0
   -4.9717   -6.2909    3.1118 C   0  0  0  0  0  0  0  0  0  0  0  0
   -5.6702   -6.5207    1.7681 C   0  0  0  0  0  0  0  0  0  0  0  0
   -6.1622   -5.1771    1.2220 C   0  0  0  0  0  0  0  0  0  0  0  0
   -5.0514   -4.2863    1.0901 O   0  0  0  0  0  0  0  0  0  0  0  0
   -7.1100   -4.6163    2.1341 O   0  0  0  0  0  0  0  0  0  0  0  0
   -7.7793   -3.4641    1.6070 C   0  0  0  0  0  0  0  0  0  0  0  0
   -8.6893   -3.9167    0.4616 C   0  0  0  0  0  0  0  0  0  0  0  0
   -7.9236   -4.8222   -0.4632 C   0  0  0  0  0  0  0  0  0  0  0  0
   -6.8028   -5.3845   -0.1217 C   0  0  0  0  0  0  0  0  0  0  0  0
   -8.6198   -2.8090    2.7049 C   0  0  0  0  0  0  0  0  0  0  0  0
   -7.9115   -2.8823    5.0404 C   0  0  0  0  0  0  0  0  0  0  0  0
   -7.7230   -2.3897    3.8412 C   0  0  0  0  0  0  0  0  0  0  0  0
   -6.3663   -3.6172    6.7394 O   0  0  0  0  0  0  0  0  0  0  0  0
   -7.0147   -2.4630    6.1767 C   0  0  0  0  0  0  0  0  0  0  0  0
   -4.7366   -1.1907    2.6004 O   0  0  0  0  0  0  0  0  0  0  0  0
   -1.5730   -1.0613    1.2260 O   0  0  0  0  0  0  0  0  0  0  0  0
   -5.0980   -3.5527    3.0211 H   0  0  0  0  0  0  0  0  0  0  0  0
   -7.0442   -2.7518    1.2324 H   0  0  0  0  0  0  0  0  0  0  0  0
   -6.7832   -7.3979    1.9522 O   0  0  0  0  0  0  0  0  0  0  0  0
   -9.3320   -1.5798    2.1370 C   0  0  0  0  0  0  0  0  0  0  0  0
   -6.2668   -1.7563    5.8169 H   0  0  0  0  0  0  0  0  0  0  0  0
   -6.2425   -3.3822    8.1520 C   0  0  0  0  0  0  0  0  0  0  0  0
   -7.8547   -1.8171    7.2962 C   0  0  0  0  0  0  0  0  0  0  0  0
   -7.5697   -2.6946    8.5404 C   0  0  0  0  0  0  0  0  0  0  0  0
   -6.0997   -4.7018    8.9014 C   0  0  0  0  0  0  0  0  0  0  0  0
   -4.7553   -5.3455    8.5429 C   0  0  0  0  0  0  0  0  0  0  0  0
   -3.6314   -4.3519    8.8507 C   0  0  0  0  0  0  0  0  0  0  0  0
   -3.8725   -3.0599    8.0638 C   0  0  0  0  0  0  0  0  0  0  0  0
   -5.1460   -2.5183    8.4222 O   0  0  0  0  0  0  0  0  0  0  0  0
   -2.3751   -4.9174    8.4735 O   0  0  0  0  0  0  0  0  0  0  0  0
   -1.2456   -4.1093    8.8223 C   0  0  0  0  0  0  0  0  0  0  0  0
   -1.4342   -2.7348    8.2167 C   0  0  0  0  0  0  0  0  0  0  0  0
   -2.7717   -2.0512    8.4166 C   0  0  0  0  0  0  0  0  0  0  0  0
   -1.1481   -3.9915   10.3446 C   0  0  0  0  0  0  0  0  0  0  0  0
    0.0912   -3.1741   10.7146 C   0  0  0  0  0  0  0  0  0  0  0  0
   -0.4724   -2.1551    7.5422 C   0  0  0  0  0  0  0  0  0  0  0  0
    0.1214   -2.9503   12.2279 C   0  0  0  0  0  0  0  0  0  0  0  0
    1.4218   -2.2419   12.6127 C   0  0  0  0  0  0  0  0  0  0  0  0
    2.6161   -3.0946   12.1765 C   0  0  0  0  0  0  0  0  0  0  0  0
   -3.8536   -3.2737    6.9951 H   0  0  0  0  0  0  0  0  0  0  0  0
   -3.6241   -4.1310    9.9181 H   0  0  0  0  0  0  0  0  0  0  0  0
   -2.8659   -0.9125    7.5584 O   0  0  0  0  0  0  0  0  0  0  0  0
   -0.3357   -4.5616    8.4279 H   0  0  0  0  0  0  0  0  0  0  0  0
   -1.0466   -5.2965   10.9179 O   0  0  0  0  0  0  0  0  0  0  0  0
    1.4623   -2.0565   14.0291 O   0  0  0  0  0  0  0  0  0  0  0  0
    2.6298   -1.3786   14.4966 C   0  0  0  0  0  0  0  0  0  0  0  0
    3.8731   -2.1949   14.1344 C   0  0  0  0  0  0  0  0  0  0  0  0
    3.9119   -2.4072   12.6179 C   0  0  0  0  0  0  0  0  0  0  0  0
    1.4676   -1.2719   12.1176 H   0  0  0  0  0  0  0  0  0  0  0  0
    2.5525   -1.2187   16.0171 C   0  0  0  0  0  0  0  0  0  0  0  0
    1.3431   -0.3480   16.3710 C   0  0  0  0  0  0  0  0  0  0  0  0
    1.4686    0.9979   15.6504 C   0  0  0  0  0  0  0  0  0  0  0  0
    1.5856    0.7517   14.1439 C   0  0  0  0  0  0  0  0  0  0  0  0
    2.7115   -0.0897   13.8859 O   0  0  0  0  0  0  0  0  0  0  0  0
    2.4439   -2.1989   16.4813 H   0  0  0  0  0  0  0  0  0  0  0  0
    2.5228   -4.4762   12.8272 C   0  0  0  0  0  0  0  0  0  0  0  0
   -4.5406   -1.8425    0.2815 C   0  0  0  0  0  0  0  0  0  0  0  0
   -1.0716   -2.0853   12.6394 C   0  0  0  0  0  0  0  0  0  0  0  0
   -8.4774   -5.0879   -1.8393 C   0  0  0  0  0  0  0  0  0  0  0  0
  2  3  1  0      
  3  1  1  0      
  4  5  1  0      
  5  6  1  0      
  6  2  1  0      
  4  7  1  0      
  7  8  1  0      
 10  5  1  0      
  9 11  1  0      
 11 12  1  0      
 12 13  1  0      
 13 14  1  0      
 14 15  2  0      
 15  9  1  0      
 16 12  1  0      
 17 18  2  0      
 18 16  1  0      
 19 20  1  0      
 20 17  1  0      
  2 21  1  0      
  3 22  2  0      
  5 23  1  0      
  9 10  1  0      
  9  8  1  0      
 12 24  1  0      
  8 25  1  0      
 16 26  1  0      
 20 27  1  0      
 20 29  1  0      
 29 30  1  0      
 30 28  1  0      
 28 19  1  0      
 28 31  1  0      
 31 32  1  0      
 32 33  1  0      
 33 34  1  0      
 34 35  1  0      
 35 28  1  0      
 33 36  1  0      
 36 37  1  0      
 37 38  1  0      
 38 39  1  0      
 39 34  1  0      
 37 40  1  0      
 40 41  1  0      
 42 38  2  0      
 41 43  1  0      
 43 44  1  0      
 44 45  1  0      
 34 46  1  0      
 33 47  1  0      
 39 48  1  0      
 37 49  1  0      
 40 50  1  0      
 44 51  1  0      
 51 52  1  0      
 52 53  1  0      
 53 54  1  0      
 54 45  1  0      
 44 55  1  0      
 52 56  1  0      
 56 57  1  0      
 57 58  1  0      
 58 59  1  0      
 59 60  1  0      
 52 60  1  0      
 56 61  1  0      
 45 62  1  0      
  2 63  1  0      
 43 64  1  0      
 14 65  1  0      
M  STY  1   1 SUP
M  SLB  1   1   1
M  SAL   1  1  62
M  SBL   1  1  68
M  SMT   1 Me
M  SBV   1 68  -10.6419    7.5290
M  STY  1   2 SUP
M  SLB  1   2   2
M  SAL   2  1  63
M  SBL   2  1  69
M  SMT   2 Me
M  SBV   2 69  -10.3398    6.4004
M  STY  1   3 SUP
M  SLB  1   3   3
M  SAL   3  1  64
M  SBL   3  1  70
M  SMT   3 Me
M  SBV   3 70   -9.9275    6.2904
M  STY  1   4 SUP
M  SLB  1   4   4
M  SAL   4  1  65
M  SBL   4  1  71
M  SMT   4 Me
M  SBV   4 71   -9.9266    7.9417
M  END
$$$$
