# Supplementary material for: In Vitro Acylation of Okadaic Acid in the Presence of Various Bivalves’ Extracts
Source: MDPI journal article supplement (doi:10.3390/md11020300), 2013-01-29
Supplement: s2 [file s2]

marinedrugs-11-00300-s001.mol
  ChemDraw04241410092D

 65 71  0  0  0  0  0  0  0  0999 V2000
   -9.2881   -0.0010    0.0000 O   0  0  0  0  0  0  0  0  0  0  0  0
   -7.8592   -0.0010    0.0000 C   0  0  0  0  0  0  0  0  0  0  0  0
   -8.5737    0.4115    0.0000 C   0  0  0  0  0  0  0  0  0  0  0  0
   -6.4302   -0.8260    0.0000 C   0  0  0  0  0  0  0  0  0  0  0  0
   -6.4302   -0.0010    0.0000 C   0  0  0  0  0  0  0  0  0  0  0  0
   -7.1447    0.4115    0.0000 C   0  0  0  0  0  0  0  0  0  0  0  0
   -5.7158   -1.2385    0.0000 C   0  0  0  0  0  0  0  0  0  0  0  0
   -5.0013   -0.8260    0.0000 C   0  0  0  0  0  0  0  0  0  0  0  0
   -5.0013   -0.0010    0.0000 C   0  0  0  0  0  0  0  0  0  0  0  0
   -5.7158    0.4115    0.0000 O   0  0  0  0  0  0  0  0  0  0  0  0
   -4.2868   -0.4135    0.0000 O   0  0  0  0  0  0  0  0  0  0  0  0
   -3.5724   -0.0010    0.0000 C   0  0  0  0  0  0  0  0  0  0  0  0
   -3.5724    0.8240    0.0000 C   0  0  0  0  0  0  0  0  0  0  0  0
   -4.2868    1.2365    0.0000 C   0  0  0  0  0  0  0  0  0  0  0  0
   -5.0013    0.8240    0.0000 C   0  0  0  0  0  0  0  0  0  0  0  0
   -2.8579   -0.4135    0.0000 C   0  0  0  0  0  0  0  0  0  0  0  0
   -1.4289   -0.4135    0.0000 C   0  0  0  0  0  0  0  0  0  0  0  0
   -2.1434   -0.0010    0.0000 C   0  0  0  0  0  0  0  0  0  0  0  0
    0.0000   -0.4135    0.0000 O   0  0  0  0  0  0  0  0  0  0  0  0
   -0.7145   -0.0010    0.0000 C   0  0  0  0  0  0  0  0  0  0  0  0
   -7.4467   -0.7154    0.0000 O   0  0  0  0  0  0  0  0  0  0  0  0
   -8.5737    1.2365    0.0000 O   0  0  0  0  0  0  0  0  0  0  0  0
   -6.4302    0.8240    0.0000 H   0  0  0  0  0  0  0  0  0  0  0  0
   -3.5724   -0.8260    0.0000 H   0  0  0  0  0  0  0  0  0  0  0  0
   -4.2868   -1.2385    0.0000 O   0  0  0  0  0  0  0  0  0  0  0  0
   -2.8579   -1.2385    0.0000 C   0  0  0  0  0  0  0  0  0  0  0  0
   -0.7145   -0.8260    0.0000 H   0  0  0  0  0  0  0  0  0  0  0  0
    0.7145   -0.0010    0.0000 C   0  0  0  0  0  0  0  0  0  0  0  0
   -0.5009    0.7959    0.0000 C   0  0  0  0  0  0  0  0  0  0  0  0
    0.5009    0.7959    0.0000 C   0  0  0  0  0  0  0  0  0  0  0  0
    0.7145   -0.8260    0.0000 C   0  0  0  0  0  0  0  0  0  0  0  0
    1.4289   -1.2385    0.0000 C   0  0  0  0  0  0  0  0  0  0  0  0
    2.1434   -0.8260    0.0000 C   0  0  0  0  0  0  0  0  0  0  0  0
    2.1434   -0.0010    0.0000 C   0  0  0  0  0  0  0  0  0  0  0  0
    1.4289    0.4115    0.0000 O   0  0  0  0  0  0  0  0  0  0  0  0
    2.8579   -1.2385    0.0000 O   0  0  0  0  0  0  0  0  0  0  0  0
    3.5724   -0.8260    0.0000 C   0  0  0  0  0  0  0  0  0  0  0  0
    3.5724   -0.0010    0.0000 C   0  0  0  0  0  0  0  0  0  0  0  0
    2.8579    0.4115    0.0000 C   0  0  0  0  0  0  0  0  0  0  0  0
    4.2868   -1.2385    0.0000 C   0  0  0  0  0  0  0  0  0  0  0  0
    5.0013   -0.8260    0.0000 C   0  0  0  0  0  0  0  0  0  0  0  0
    4.2868    0.4115    0.0000 C   0  0  0  0  0  0  0  0  0  0  0  0
    5.7158   -1.2385    0.0000 C   0  0  0  0  0  0  0  0  0  0  0  0
    6.4302   -0.8260    0.0000 C   0  0  0  0  0  0  0  0  0  0  0  0
    6.4302   -0.0010    0.0000 C   0  0  0  0  0  0  0  0  0  0  0  0
    2.1434    0.8240    0.0000 H   0  0  0  0  0  0  0  0  0  0  0  0
    2.1434   -1.6510    0.0000 H   0  0  0  0  0  0  0  0  0  0  0  0
    2.8579    1.2365    0.0000 O   0  0  0  0  0  0  0  0  0  0  0  0
    3.5724   -1.6510    0.0000 H   0  0  0  0  0  0  0  0  0  0  0  0
    4.2868   -2.0635    0.0000 O   0  0  0  0  0  0  0  0  0  0  0  0
    7.1447   -1.2385    0.0000 O   0  0  0  0  0  0  0  0  0  0  0  0
    7.8592   -0.8260    0.0000 C   0  0  0  0  0  0  0  0  0  0  0  0
    7.8592   -0.0010    0.0000 C   0  0  0  0  0  0  0  0  0  0  0  0
    7.1447    0.4115    0.0000 C   0  0  0  0  0  0  0  0  0  0  0  0
    6.4302   -1.6510    0.0000 H   0  0  0  0  0  0  0  0  0  0  0  0
    7.8592   -1.6510    0.0000 C   0  0  0  0  0  0  0  0  0  0  0  0
    8.5737   -2.0635    0.0000 C   0  0  0  0  0  0  0  0  0  0  0  0
    9.2881   -1.6510    0.0000 C   0  0  0  0  0  0  0  0  0  0  0  0
    9.2881   -0.8260    0.0000 C   0  0  0  0  0  0  0  0  0  0  0  0
    8.5737   -0.4135    0.0000 O   0  0  0  0  0  0  0  0  0  0  0  0
    7.1447   -2.0635    0.0000 H   0  0  0  0  0  0  0  0  0  0  0  0
    5.7148    0.4133    0.0000 C   0  0  0  0  0  0  0  0  0  0  0  0
   -8.2725   -0.7153    0.0000 C   0  0  0  0  0  0  0  0  0  0  0  0
    5.7148   -2.0629    0.0000 C   0  0  0  0  0  0  0  0  0  0  0  0
   -4.2870    2.0635    0.0000 C   0  0  0  0  0  0  0  0  0  0  0  0
  2  3  1  0      
  3  1  1  0      
  4  5  1  0      
  5  6  1  0      
  6  2  1  0      
  4  7  1  0      
  7  8  1  0      
 10  5  1  0      
  9 11  1  0      
 11 12  1  0      
 12 13  1  0      
 13 14  1  0      
 14 15  2  0      
 15  9  1  0      
 16 12  1  0      
 17 18  2  0      
 18 16  1  0      
 19 20  1  0      
 20 17  1  0      
  2 21  1  1      
  3 22  2  0      
  5 23  1  6      
  9 10  1  6      
  9  8  1  1      
 12 24  1  6      
  8 25  1  6      
 16 26  1  1      
 20 27  1  6      
 20 29  1  0      
 29 30  1  0      
 30 28  1  1      
 28 19  1  6      
 28 31  1  0      
 31 32  1  0      
 32 33  1  0      
 33 34  1  0      
 34 35  1  0      
 35 28  1  0      
 33 36  1  0      
 36 37  1  0      
 37 38  1  0      
 38 39  1  0      
 39 34  1  0      
 37 40  1  0      
 40 41  1  0      
 42 38  2  0      
 41 43  1  0      
 43 44  1  0      
 44 45  1  0      
 34 46  1  6      
 33 47  1  1      
 39 48  1  6      
 37 49  1  6      
 40 50  1  6      
 44 51  1  0      
 51 52  1  0      
 52 53  1  0      
 53 54  1  0      
 54 45  1  0      
 44 55  1  1      
 52 56  1  0      
 56 57  1  0      
 57 58  1  0      
 58 59  1  0      
 59 60  1  0      
 52 60  1  1      
 56 61  1  1      
 45 62  1  6      
  2 63  1  6      
 43 64  1  1      
 14 65  1  0      
M  STY  1   1 SUP
M  SLB  1   1   1
M  SAL   1  1  62
M  SBL   1  1  68
M  SMT   1 Me
M  SBV   1 68  -10.6419    7.5290
M  STY  1   2 SUP
M  SLB  1   2   2
M  SAL   2  1  63
M  SBL   2  1  69
M  SMT   2 Me
M  SBV   2 69  -10.3398    6.4004
M  STY  1   3 SUP
M  SLB  1   3   3
M  SAL   3  1  64
M  SBL   3  1  70
M  SMT   3 Me
M  SBV   3 70   -9.9275    6.2904
M  STY  1   4 SUP
M  SLB  1   4   4
M  SAL   4  1  65
M  SBL   4  1  71
M  SMT   4 Me
M  SBV   4 71   -9.9266    7.9417
M  END
